# Supplementary material for: Large-area nanoscale farmland-like surfaces of one-dimensional NbO2nanorods with multi-growth directions: studies on the purple-blue photoluminescence and low-field electron emissions
Source: Royal Society of Chemistry journal article supplement (doi:10.1039/c4tc01347f), 2014-01-01
Supplement: c4tc01347f1.pdf [file c4tc01347f1.pdf]

## Supporting Information

### **Large-area nanoscale farmland-like surfaces of one-dimensional NbO<sub>2</sub> nanorods with multi-growth directions: Studies on the purple-blue photoluminescence and low-field electron emissions**

*Jin-Han Lin,<sup>a,b</sup> Ranjit A. Patil,<sup>a</sup> Ming-Ann Wu,<sup>a</sup> Lian-Guang Yu,<sup>a</sup> Ken-Da Liu,<sup>a</sup> Wan-Ting Gao,<sup>a</sup> Rupesh S. Devan,<sup>c</sup> Ching-Hwa Ho,<sup>d</sup> Yung Liou,<sup>b</sup> and Yuan-Ron Ma<sup>\*a</sup>*

*<sup>a</sup> Department of Physics, National Dong Hwa University, Hualien 97401, Taiwan, Republic of China. Tel: +886-3-8633706; Fax: +886-3-8633690;*

*E-mail: ronma@mail.ndhu.edu.tw*

*<sup>b</sup> Institute of Physics, Academia Sinica, Taipei 11529, Taiwan, Republic of China*

*<sup>c</sup> Department of Physics, University of Pune, Pune 411007, Maharashtra, India*

*<sup>d</sup> Graduate Institute of Applied Science and Technology, National Taiwan University of Science and Technology, Taipei 106, Taiwan, Republic of China*

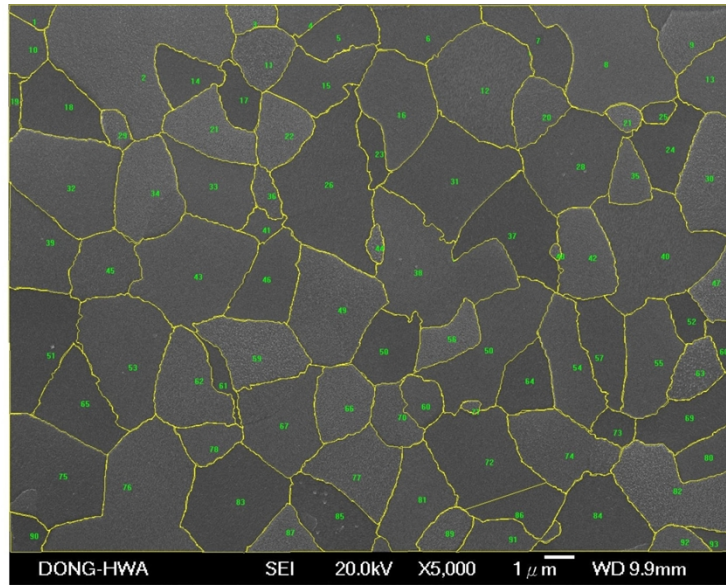

| No. | Area ( $\mu\text{m}^2$ ) | No.   | Area ( $\mu\text{m}^2$ ) |
|-----|--------------------------|-----|--------------------------|-----|--------------------------|-----|--------------------------|-----|--------------------------|-------|--------------------------|
| 1   | 0.4                      | 17  | 1.1                      | 33  | 2.6                      | 49  | 3.7                      | 65  | 2.6                      | 81    | 2.3                      |
| 2   | 7.3                      | 18  | 2.2                      | 34  | 2.8                      | 50  | 4.1                      | 66  | 2.0                      | 82    | 3.4                      |
| 3   | 0.6                      | 19  | 0.4                      | 35  | 0.9                      | 51  | 3.3                      | 67  | 3.2                      | 83    | 4.0                      |
| 4   | 0.7                      | 20  | 1.3                      | 36  | 0.4                      | 52  | 0.7                      | 68  | 0.6                      | 84    | 3.0                      |
| 5   | 1.3                      | 21  | 1.8                      | 37  | 3.2                      | 53  | 4.3                      | 69  | 2.1                      | 85    | 2.3                      |
| 6   | 2.5                      | 22  | 1.5                      | 38  | 5.1                      | 54  | 2.4                      | 70  | 1.2                      | 86    | 1.6                      |
| 7   | 1.9                      | 23  | 0.9                      | 39  | 2.6                      | 55  | 2.6                      | 71  | 0.1                      | 87    | 0.9                      |
| 8   | 5.1                      | 24  | 2.0                      | 40  | 4.8                      | 56  | 1.2                      | 72  | 3.8                      | 88    | 0.0                      |
| 9   | 2.0                      | 25  | 0.3                      | 41  | 0.5                      | 57  | 1.8                      | 73  | 0.6                      | 89    | 0.8                      |
| 10  | 0.9                      | 26  | 5.6                      | 42  | 2.3                      | 58  | 1.9                      | 74  | 2.7                      | 90    | 0.7                      |
| 11  | 1.4                      | 27  | 0.3                      | 43  | 4.6                      | 59  | 2.5                      | 75  | 4.1                      | 91    | 0.9                      |
| 12  | 4.3                      | 28  | 3.7                      | 44  | 0.2                      | 60  | 0.6                      | 76  | 5.9                      | 92    | 0.6                      |
| 13  | 1.5                      | 29  | 0.4                      | 45  | 1.9                      | 61  | 0.5                      | 77  | 2.5                      | 93    | 0.4                      |
| 14  | 1.3                      | 30  | 2.6                      | 46  | 2.2                      | 62  | 2.4                      | 78  | 1.0                      | 94    | 0.1                      |
| 15  | 2.3                      | 31  | 4.6                      | 47  | 1.0                      | 63  | 1.1                      | 79  | 0.0                      | Total | 193.7                    |
| 16  | 2.8                      | 32  | 4.3                      | 48  | 0.1                      | 64  | 1.5                      | 80  | 1.2                      |       |                          |

Fig. S1. The FESEM image shows the spectacular scenic nanoscale farmland-like surface containing various domains outlined in yellow. The 94 domains range in area from a few square submicrometers to a few square micrometers.

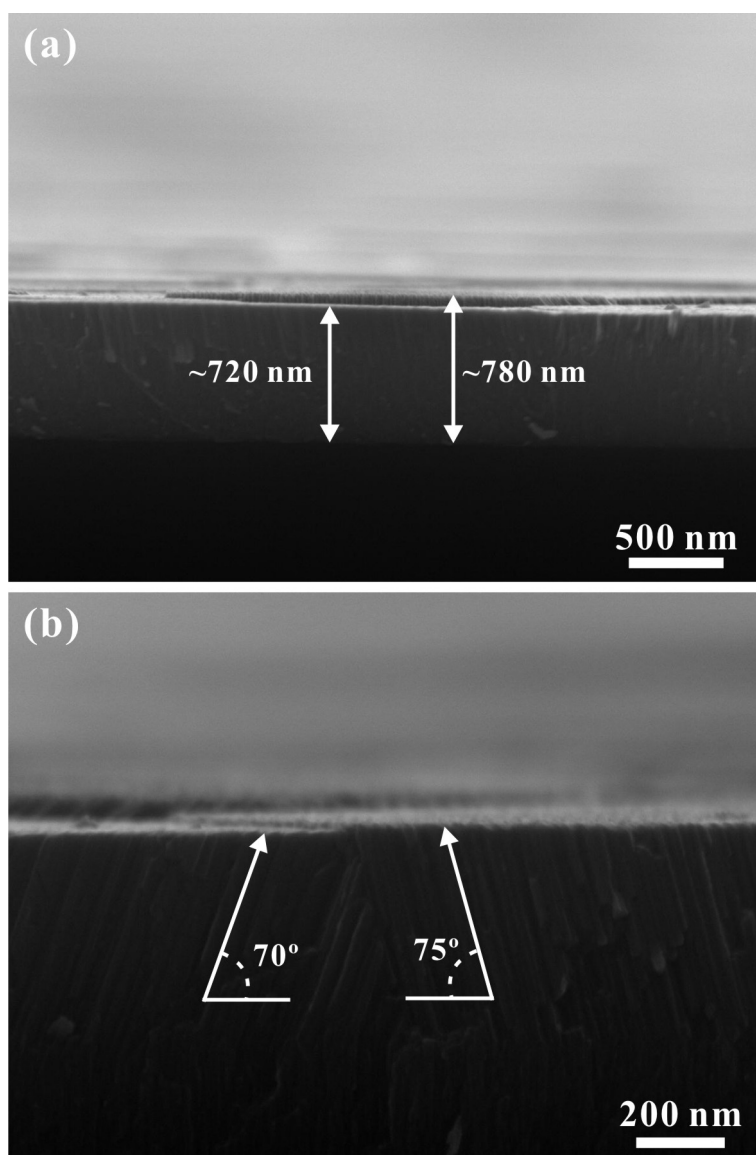

Fig. S2. FESEM images showing side views ( $90^\circ$  to the surface normal direction) of the nanoscale farmland-like surface. (a) Two distinct domains that can be seen in the scenic nanoscale farmland-like surface are  $\sim 720$  or  $\sim 780$  nm thick, indicating the real lengths of the 1D niobium-oxide nanorods to be  $\sim 720$  or  $780$  nm. As mentioned in the main body of the text, the nanoscale farmland-like surface contains of many distinct domains. (b) Two distinct domains consisting of 1D niobium-oxide nanorods growing in two different directions of  $70^\circ$  and  $75^\circ$ , respectively, to the surface horizontal direction. This indicates that each domain in the nanoscale farmland-like surface has its own growth direction for 1D niobium-oxide nanorods. For example, the other three domains shown in Figure 1d each possess three distinct growth directions (represented by three arrows). Hence, the 1D niobium-oxide nanorods grow in different directions in different domains in the scenic nanoscale farmland-like surface.

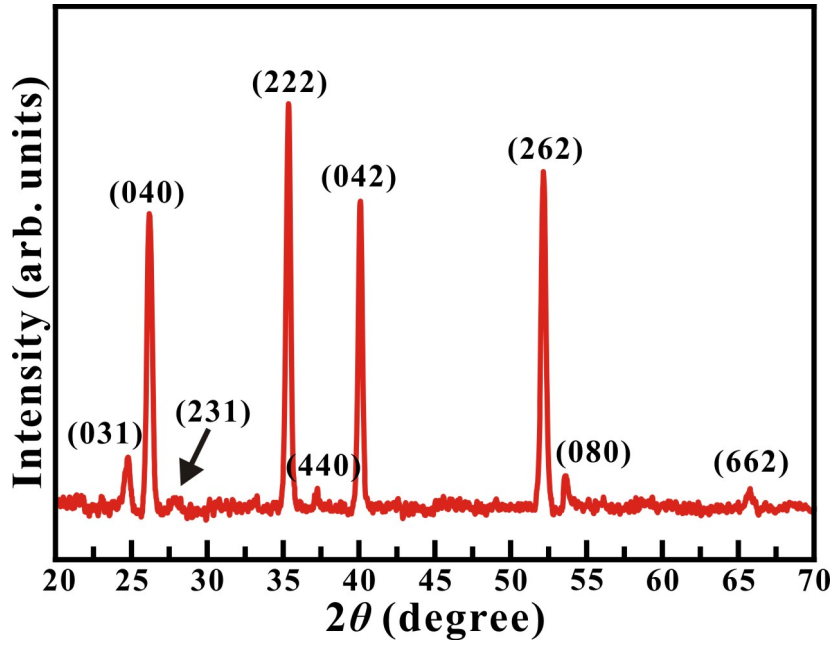

Fig. S3. The XRD patterns reveal the detailed crystalline structure of the as-synthesized 1D niobium-oxide nanorods. The diffraction peaks at  $2\theta = 24.8^\circ$ ,  $26.2^\circ$ ,  $27.9^\circ$ ,  $35.4^\circ$ ,  $37.3^\circ$ ,  $40.1^\circ$ ,  $52.2^\circ$ ,  $53.6^\circ$ , and  $65.8^\circ$  correspond respectively to the (031), (040), (231), (222), (440), (042), (262), (080), and (662) lattice planes of the tetragonal  $\text{NbO}_2$  crystal in the space group  $I41/a$  with lattice constants of  $a = b = 13.696 \text{ \AA}$ ,  $c = 5.981 \text{ \AA}$ , and  $\alpha = \beta = \gamma = 90^\circ$  (JCPDS card No. 71-0020). The XRD results indicate that the 1D niobium-oxide nanorods arranged in the domains are  $\text{NbO}_2$  crystals only.
